# Supplementary material for: Sex Modifies the Effect of Genetic Risk Scores for Polycystic Ovary Syndrome on Metabolic Phenotypes
Source: bioRxiv or medRxiv preprint supplement (doi:10.1101/2021.10.23.21265391), 2021-10-25
Supplement: Supplementary file [file media-1.pdf]

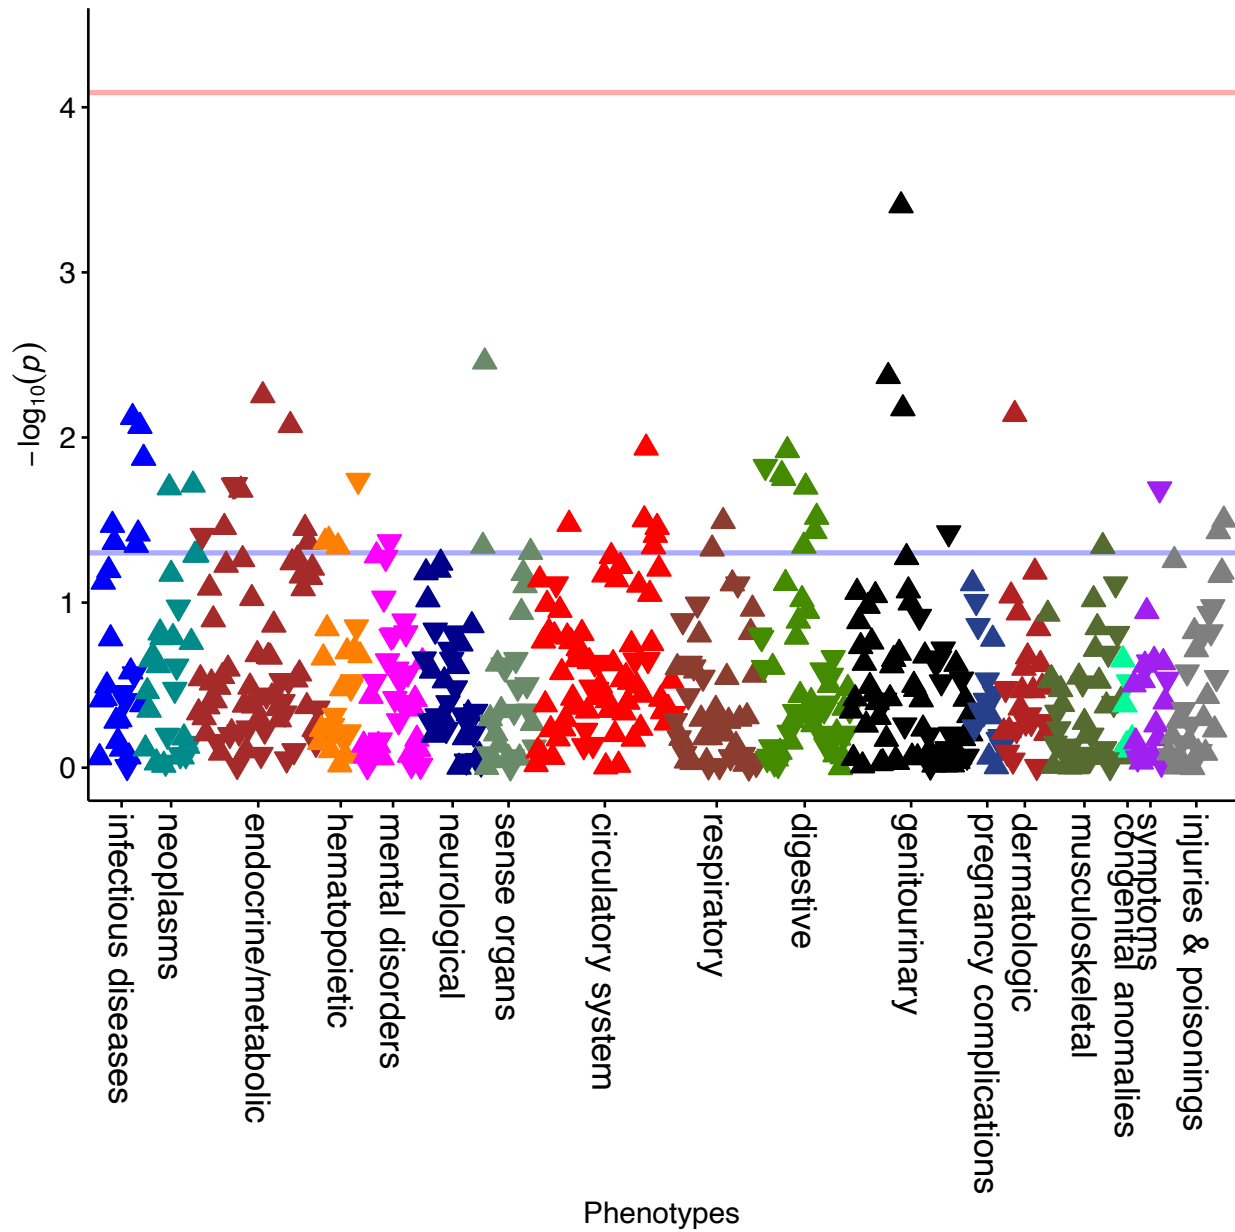

1  
2  
3  
4  
5  
6  
7  
8

**Supplementary Figure 1. The African Descent PCOS<sub>PRS</sub> PheWAS is Underpowered.** No associations passed Bonferroni correction ( $P = 8.14 \times 10^{-5}$ ) for PCOS<sub>PRS</sub> calculated in African ancestry individuals. The red line represents the Bonferroni correction and the blue represents the false discovery rate of  $P < 0.05$ .

A.

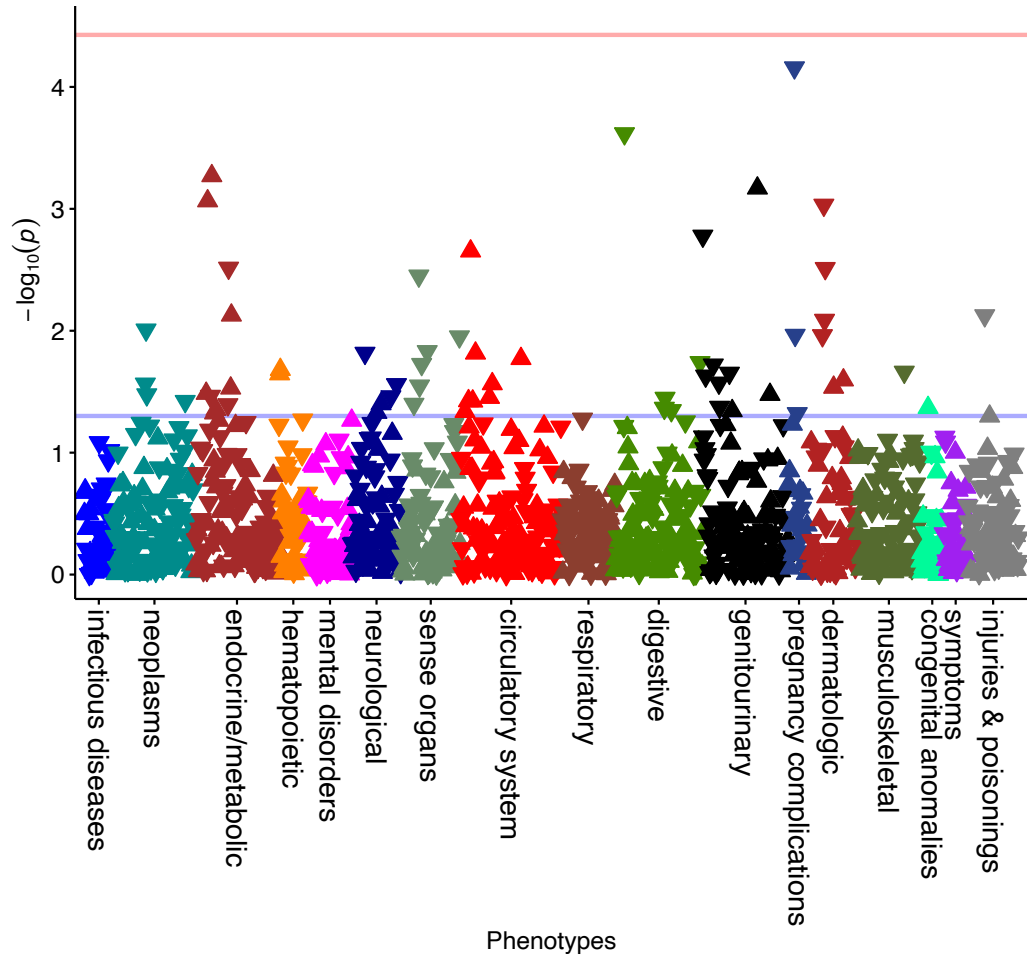

B.

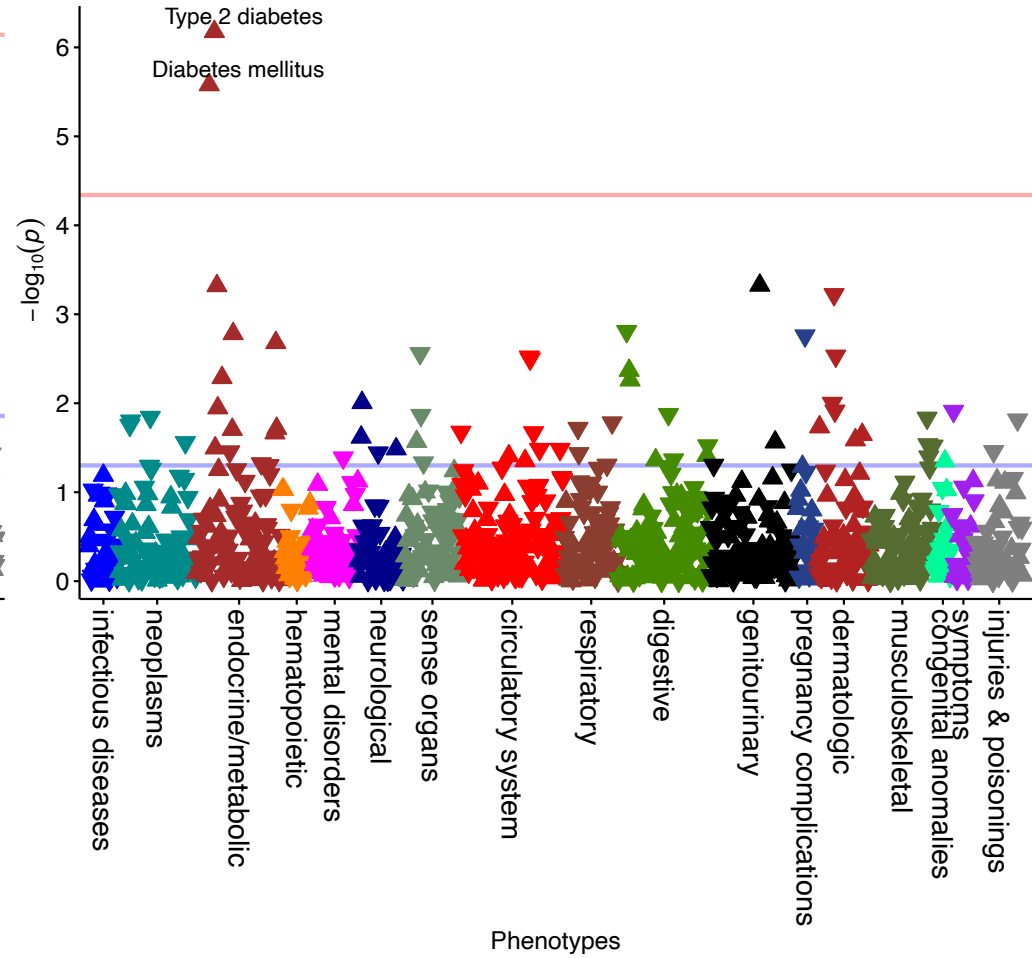

9 **Supplementary Figure 2. Pleiotropic Associations are Influenced by Phenotypic Features of PCOS.** To determine the  
 10 robustness of the observed significant associations with PCOS<sub>PRS</sub>, sensitivity analyses were employed. First, (A) PCOS<sub>PRS</sub> was  
 11 adjusted for BMI in everyone. No associations passed Bonferroni correction, represented by the red line ( $P=3.74e-05$ ). The blue line  
 12 represents a false discovery rate of 0.05. To identify what phenotypes were not the result of a diagnosis, (B) females were stratified  
 13 and further adjusted for PCOS case status ( $P=4.57e-05e$ ).

A.

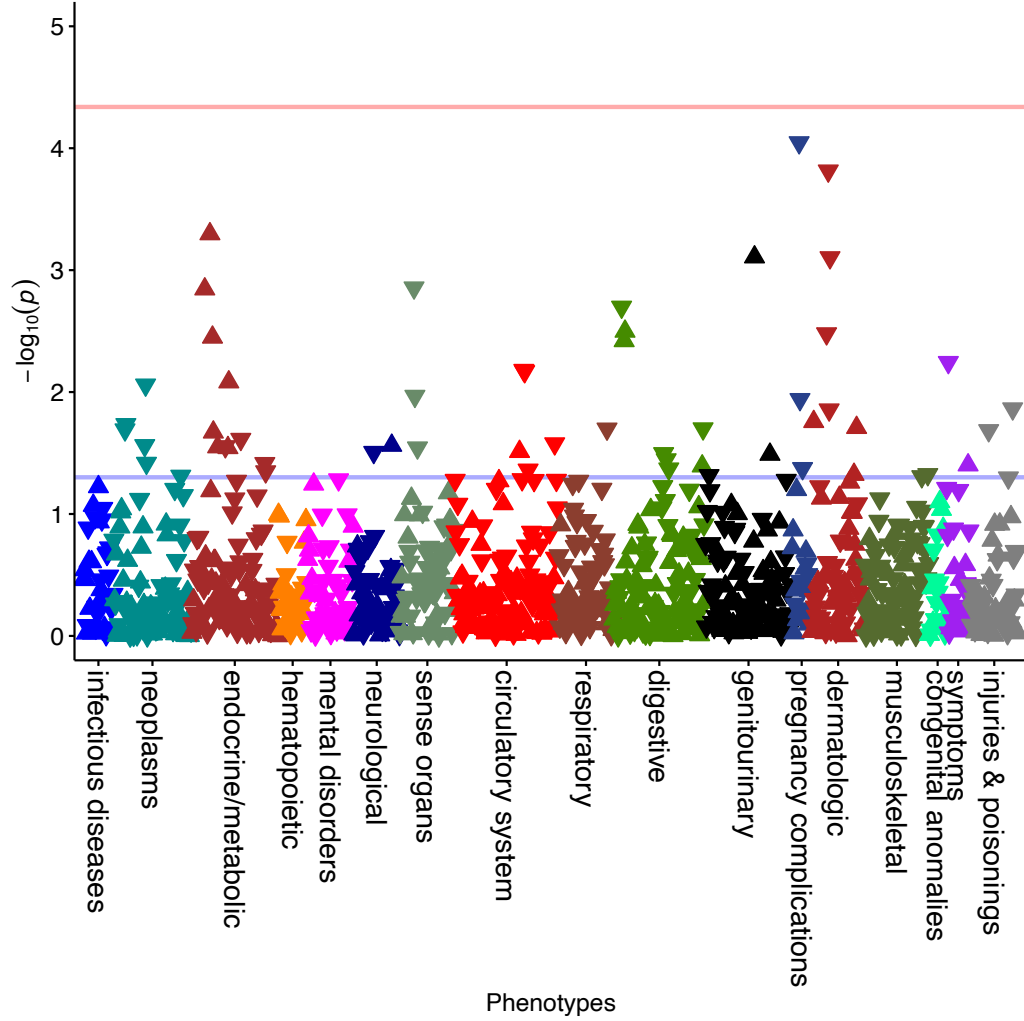

B.

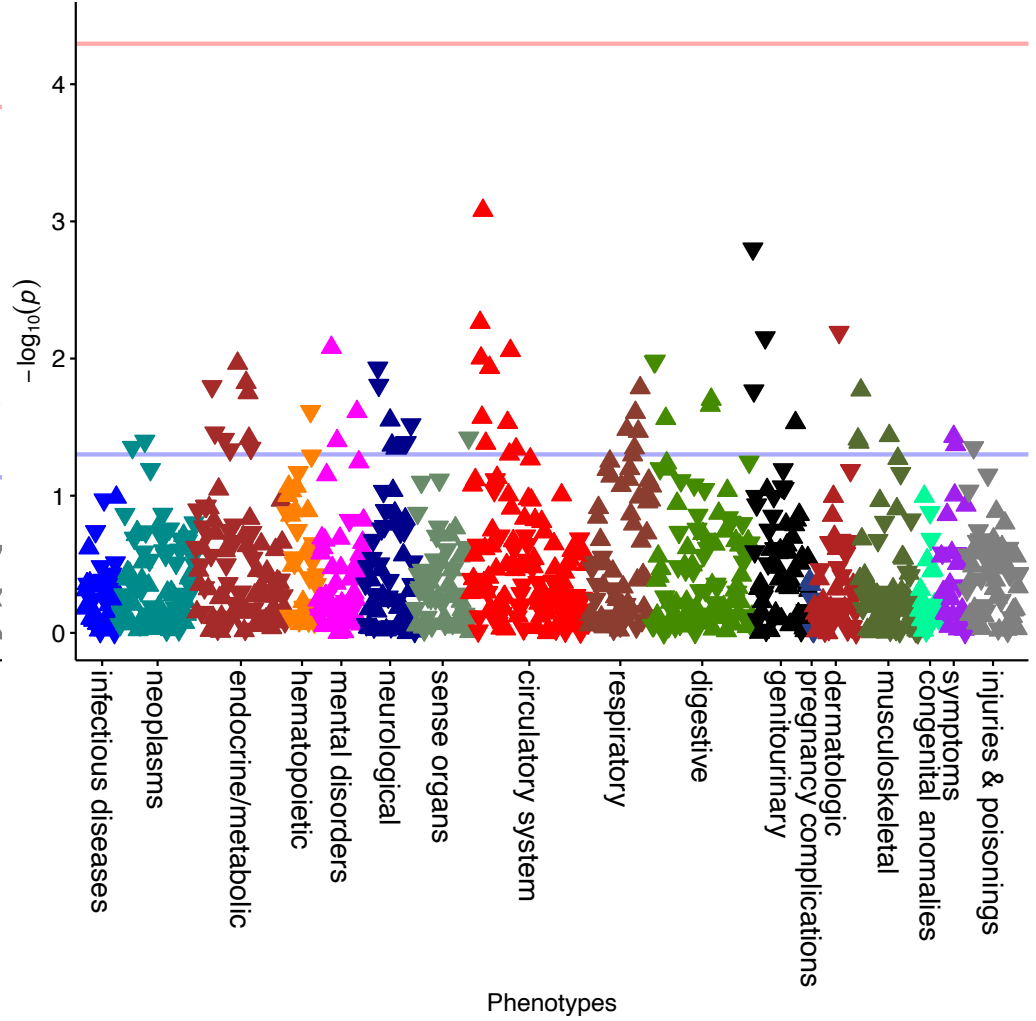

14 **Supplementary Figure 3. Associations Driven by Sex Differentiated PCOS<sub>PRS</sub> Can Be Explained by BMI.** Sex stratified  
 15 analyses were adjusted for body mass index (BMI) in a sensitivity analysis. Results are shown for (A) females (P=5.07e-05) and (B)  
 16 males (P=4.90e-05). The red line represents the Bonferroni correction and the blue represents the false discovery rate of P < 0.05.  
 17  
 18

A.

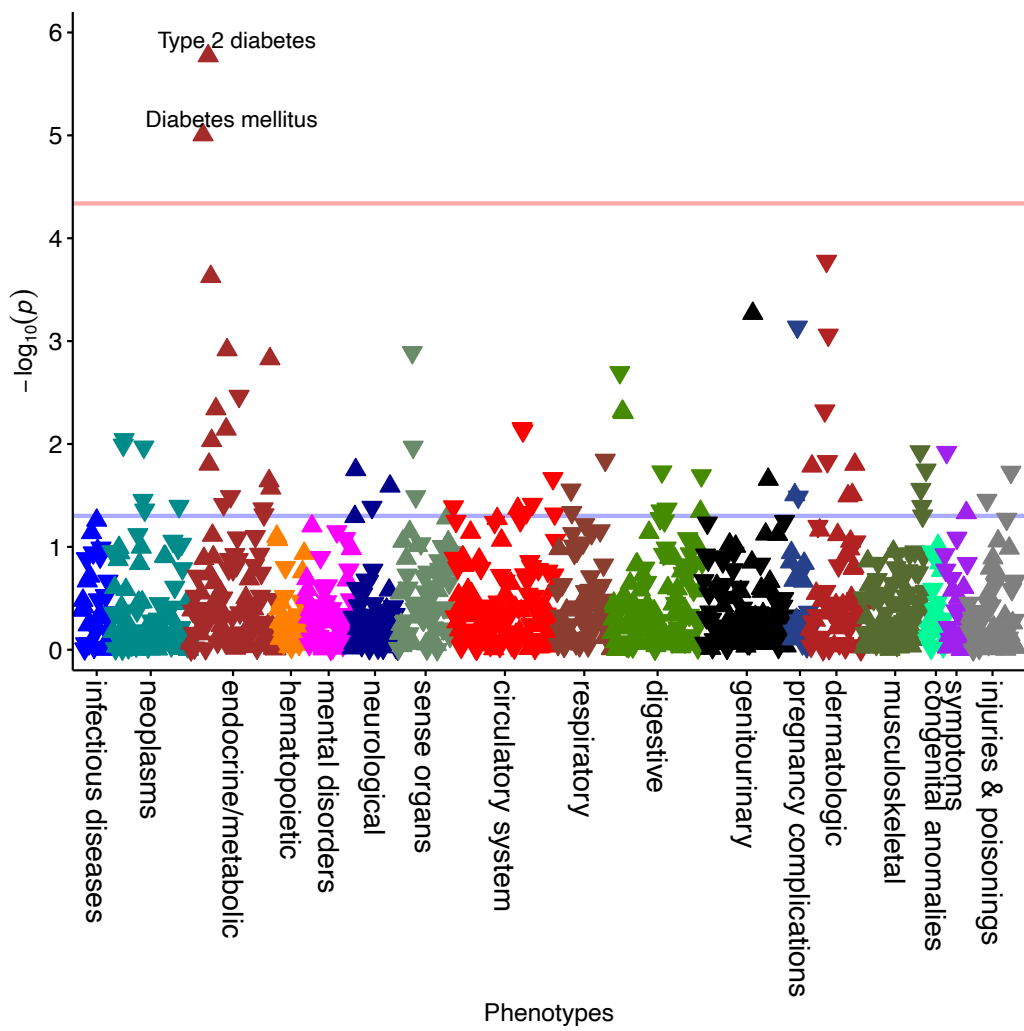

B.

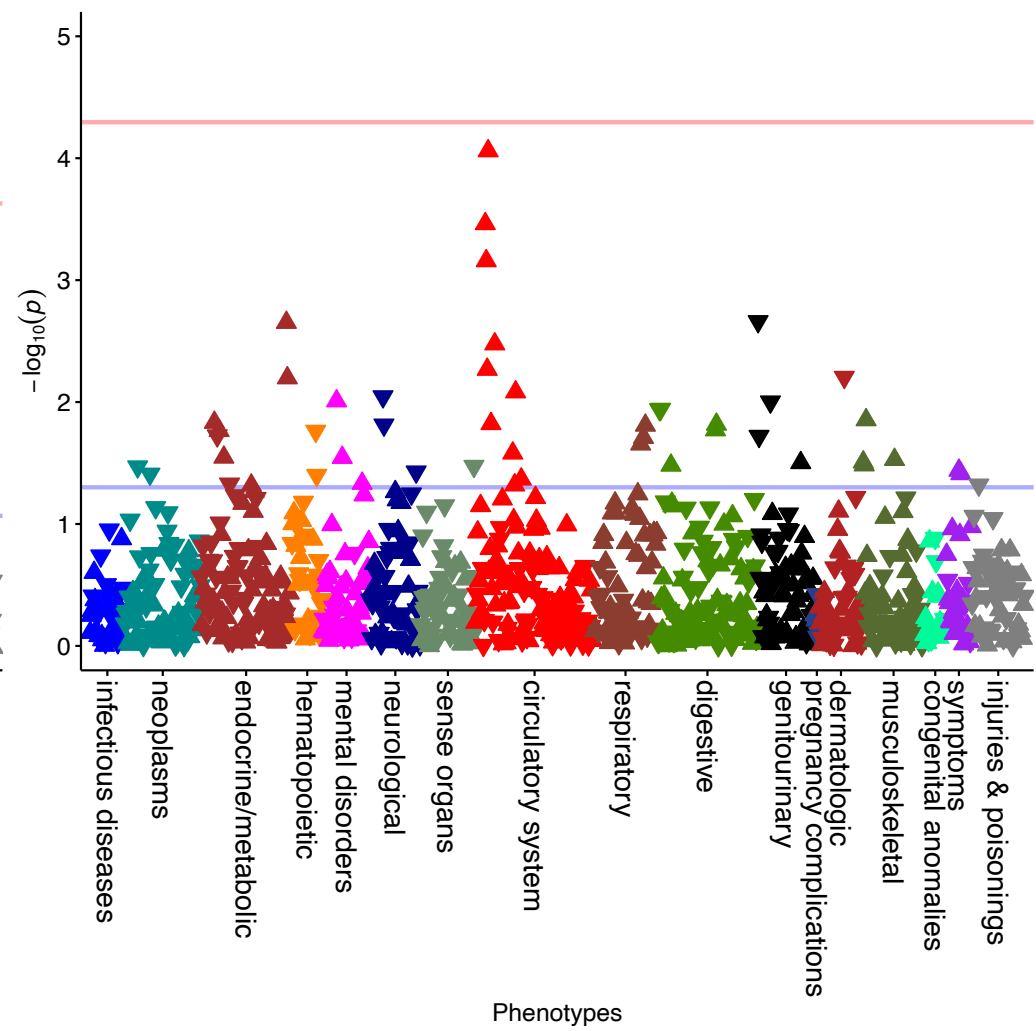

19

20 **Supplementary Figure 4. Accounting for BMI<sub>residual</sub> in the PCOS<sub>PRS</sub> PheWAS Analysis Improves Associations.** PCOS<sub>PRS</sub> were  
 21 stratified by sex and adjusted for BMI<sub>residual</sub> in addition to age and the top ten principal components for (A) females and (B) males. The  
 22 Bonferroni correction for females was P=4.59e-05 and P=5.07e-05 for males. The red line represents the Bonferroni correction and  
 23 the blue represents the false discovery rate of P < 0.05.

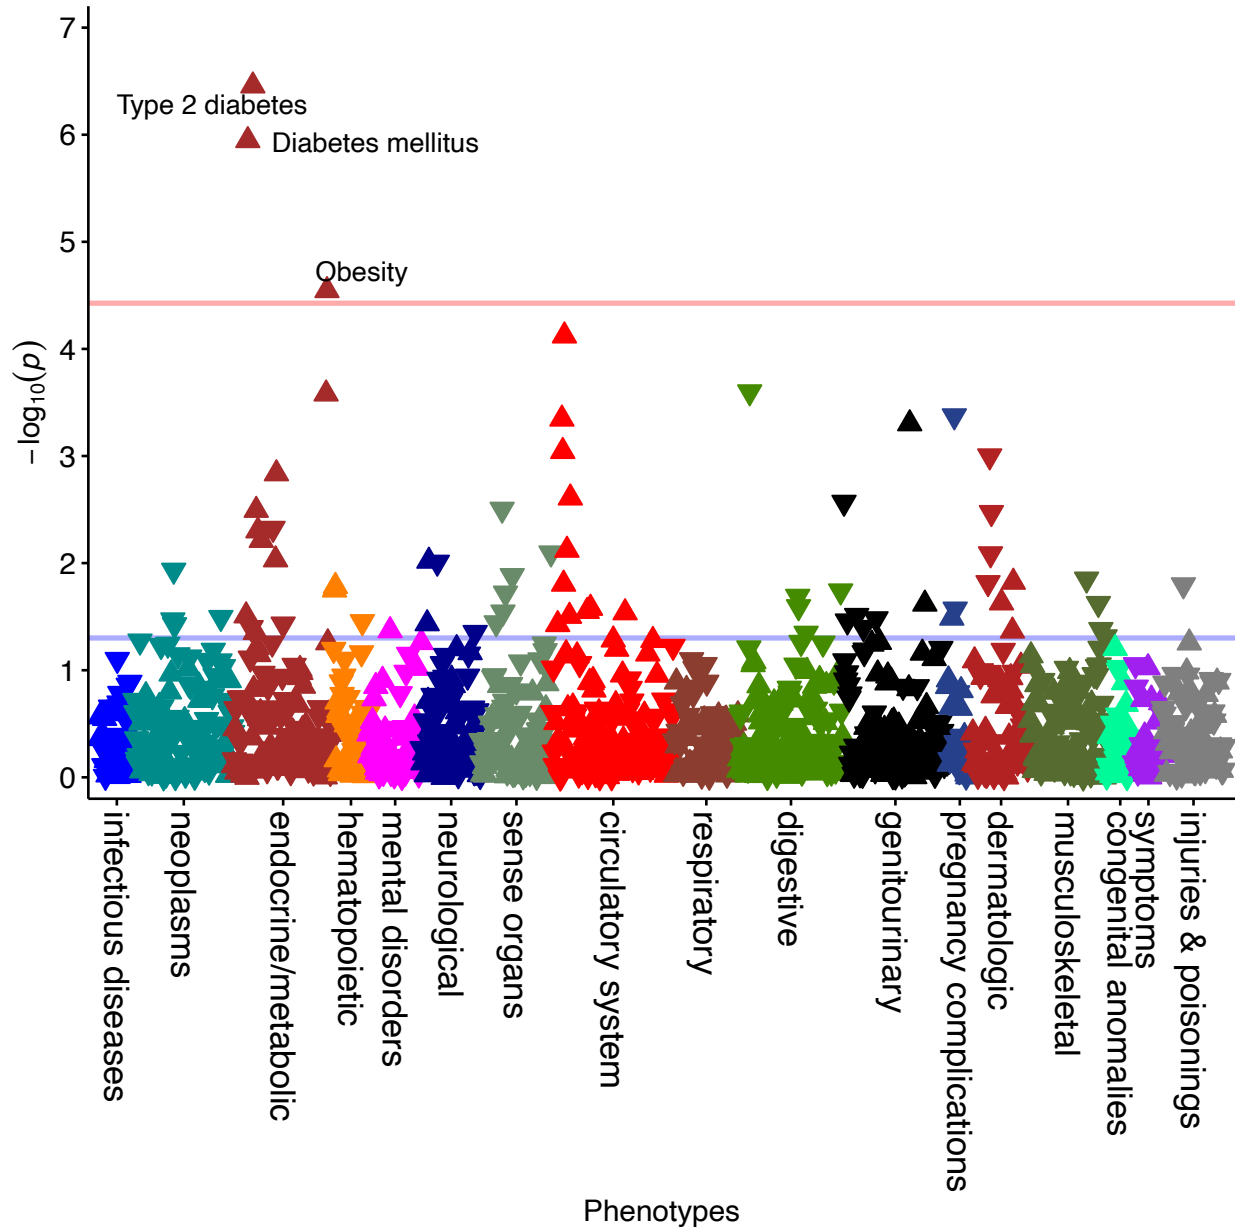

24  
25  
26  
27  
28  
29

**Supplementary Figure 5. Accounting for BMI<sub>residual</sub> Improves Detection of Obesity in the Sex-Combined Dataset.** The model was adjusted for adjusted for BMI<sub>residual</sub>, age, and the top ten principal components. The red line represents the Bonferroni correction of  $P = 3.74 \times 10^{-5}$  and the blue represents the false discovery rate of  $P < 0.05$ .
